# Supplementary material for: Tailored therapeutic release from polycaprolactone-silica hybrids for the treatment of osteomyelitis: antibiotic rifampicin and osteogenic silicates
Source: Royal Society of Chemistry journal article supplement (doi:10.1039/d1bm02015c), 2022-01-01
Supplement: d1bm02015c1.pdf [file d1bm02015c1.pdf]

Tailored therapeutic release from polycaprolactone-silica hybrids for the treatment of osteomyelitis:  
antibiotic rifampicin and osteogenic silicates - Supplementary data

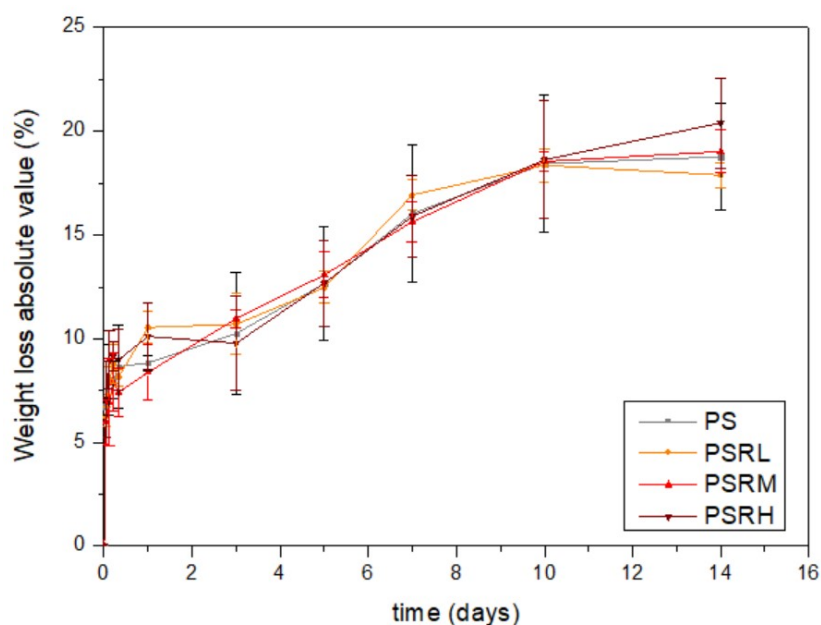

**Figure S1:** Weight loss in  $\alpha$ MEM for the four hybrid formulations, monitored over the course of two weeks. No variation associated with different formulations was assessed ( $p \gg 0.05$ )

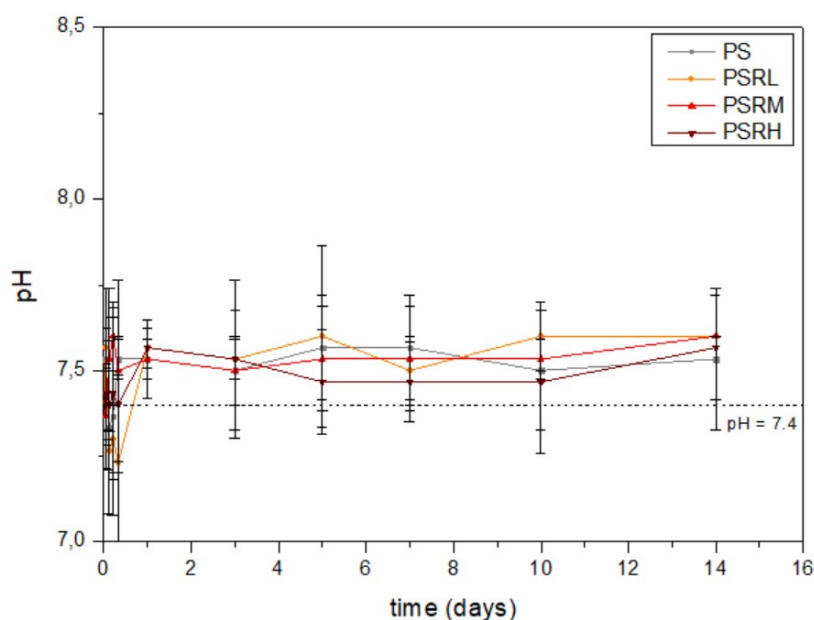

**Figure S2:** pH variation in  $\alpha$ MEM for the four hybrid formulations, monitored over the course of two weeks. The standard pH of  $\alpha$ MEM is highlighted (7.4). No significant variation from 7.4 was assessed, regardless of the formulation ( $p \gg 0.05$ ).
